# Supplementary material for: Dating and morpho-stratigraphy of uplifted marine terraces in the Makran subduction zone (Iran)
Source: Copernicus journal article supplement (doi:10.5194/esurf-7-321-2019), 2019-03-26
Supplement: Supplementary file 2 [file esurf-7-321-2019-supplement.zip]

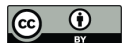

## *Supplement of*

# **Dating and morpho-stratigraphy of uplifted marine terraces in the Makran subduction zone (Iran)**

**Raphaël Normand et al.**

*Correspondence to:* Raphaël Normand ([raphnormand@gmail.com](mailto:raphnormand@gmail.com))

- [esurf-7-321-2019-supplement-title-page.pdf](#)
- [SUPP\\_S1\\_Previous dates.xlsx](#)
- [SUPP\\_S2\\_Terraces.xlsx](#)
- [SUPP\\_S3.pdf](#)

The copyright of individual parts of the supplement might differ from the CC BY 4.0 License.
